# Supplementary material for: Identification of the first small-molecule ligand of the neuronal receptor sortilin and structure determination of the receptor–ligand complex
Source: PubMed Central journal article supplement (PMC3940197; doi:10.1107/s1399004713030149), 2014-01-29
Supplement: d-70-00451-sup1.pdf [file d-70-00451-sup1.pdf]

---

## SUPPORTING INFORMATION

### Identification of the first small molecule ligand of the neuronal receptor sortilin; and structure determination of the receptor-ligand complex

Authors

**Jacob Lauwring Andersen<sup>a\*</sup>, Tenna Juul Schrøder<sup>b</sup>, Søren Christensen<sup>b</sup>, Dorthe Strandbygård<sup>a</sup>, Lone Tjener Pallesen<sup>c</sup>, Maria Marta García-Alai<sup>a</sup>, Samsa Lindberg<sup>b</sup>, Morten Langgård<sup>b</sup>, Jørgen Calí Eskildsen<sup>b</sup>, Laurent David<sup>b</sup>, Lena Tagmose<sup>b</sup>, Klaus Bæk Simonsen<sup>b</sup>, Philip James Maltas<sup>b</sup>, Lars Christian Biilmann Rønn<sup>b</sup>, Inge E. M. de Jong<sup>b</sup>, Ibrahim John Malik<sup>b</sup>, Jan Egebjerg<sup>b</sup>, Jens-Jacob Karlsson<sup>b</sup>, Srinivas Uppalanchi<sup>d</sup>, Durga Rao Sakumudi<sup>d</sup>, Pradheep Eradi<sup>d</sup>, Steven P. Watson<sup>b\*</sup> and Søren Thirup<sup>a\*</sup>**

<sup>a</sup>The Lundbeck Foundation Research Centre MIND, Department of Molecular Biology and Genetics, Aarhus University, Gustav Wieds Vej 10C, Aarhus C, 8000, Denmark

<sup>b</sup>Neuroscience Drug Discovery, H. Lundbeck A/S, Ottiliavej 9, Valby, 2500, Denmark

<sup>c</sup>The Lundbeck Foundation Research Centre MIND, Department of Biomedicine, Aarhus University, Ole Worms Allé 3, Aarhus C, 8000, Denmark

<sup>d</sup>Medicinal Chemistry, GVK BioScience, Plot No. 28 A, IDA Nacharam, Hyderabad, 500076, India

Correspondence email: jla@mb.au.dk; stwa@Lundbeck.com; sth@mb.au.dk

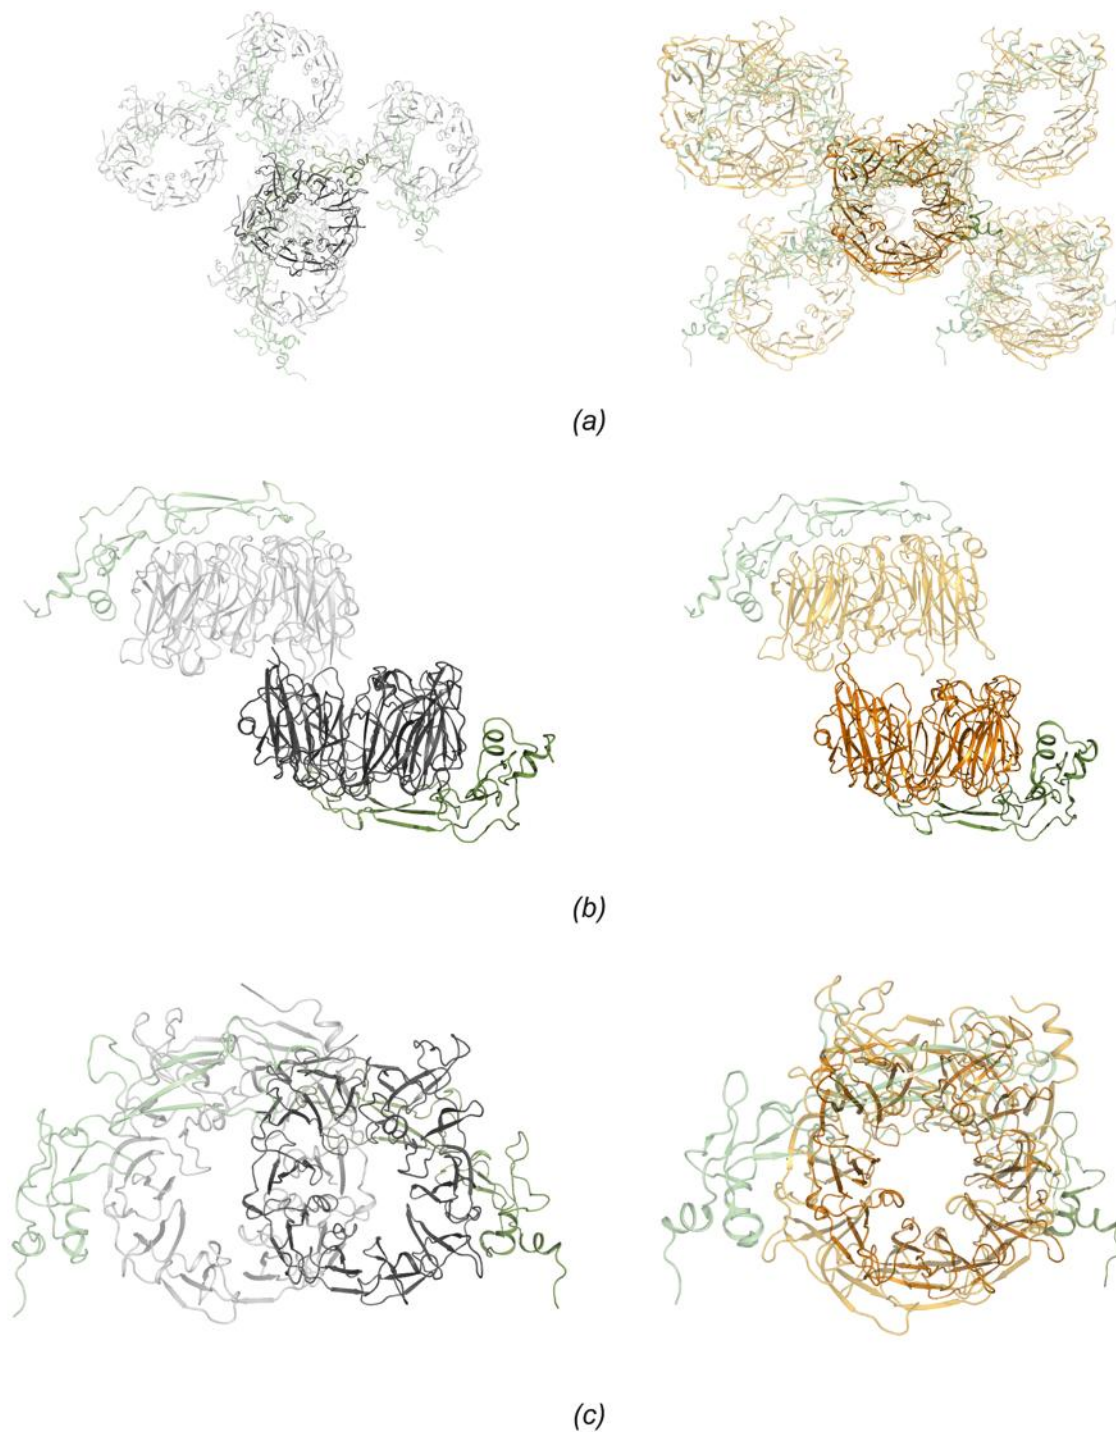

**Figure S1:** Overview of crystal packing. Differences in crystal packing between the sortilin-AF40431 complex (left figures with the  $\beta$ -propeller in grey and 10CC-domain in green) and the sortilin-neurotensin complex (right figures with the  $\beta$ -propeller in orange and 10CC-domain in green). **A)** Overview of the crystal packing with the symmetry related molecules (within a distance of 5 Å) in lighter colours. **B)** Side view displaying the off-centre packing in the sortilin-AF40431 complex crystal form. **C)** Top view displaying the off-centre packing in the sortilin-AF40431 complex crystal form.
